# Supplementary material for: Bacillus volatiles adversely affect the physiology and ultra-structure of Ralstonia solanacearum and induce systemic resistance in tobacco against bacterial wilt
Source: PubMed Central journal article supplement (PMC5238454; doi:10.1038/srep40481), 2017-01-16
Supplement: srep40481-s1.pdf [file srep40481-s1.pdf]

1  
2  
3  
4  
5  
6  
7  
8  
9  
10  
11  
12

## Supplementary Information

***Bacillus volatiles* adversely affect the physiology and ultra-structure of *Ralstonia solanacearum* and induce systemic resistance in tobacco against bacterial wilt**

Hafiz Abdul Samad Tahir, Huijun Wu, Yuedi Niu, Qin Gu, Rong Hu, Xuewen Gao \*

Department of Plant Pathology, College of Plant Protection, Nanjing Agricultural University, Key Laboratory of Integrated Management of Crop Diseases and Pests, Ministry of Education, Nanjing 210095, PR China

\* Corresponding author: Xuewen Gao

Address: Nanjing Agricultural University, Weigang No.1, Nanjing 210095, PR China

Email: gaoxw@njau.edu.cn

Telephone/Fax: 86-25-8439526

13 **Table S1: Bacteria used in this study**

| No | Strain                                  | Antagonistic strain or pathogen | Accession NO |
|----|-----------------------------------------|---------------------------------|--------------|
| 1  | <i>Bacillus amyloliquefacians</i> FZB42 | Antagonist                      | NR075005.1   |
| 2  | <i>Bacillus cereus</i> NMSL88           | Antagonist                      | GU568190.1   |
| 3  | <i>Bacillus amyloliquefacians</i> NMSX4 | Antagonist                      | GU568185.1   |
| 4  | <i>Bacillus subtilis</i> FA26           | Antagonist                      | KY003098     |
| 5  | <i>Bacillus artrophaeus</i> LSSC22      | Antagonist                      | GU568193.1   |
| 6  | <i>Bacillus pumulis</i> GBSW19          | Antagonist                      | GU568202.1   |
| 7  | <i>Ralstonia solanacearum</i> TBBS1     | Pathogen                        | KY003096     |

14

15 **Table S2: Primers used in the study**

| No | Oligo Name                    | Sequence 5' to 3'    |
|----|-------------------------------|----------------------|
| 1  | <i>16sr RNA Rsc</i> TBBS1 (F) | AGTCCACGCCCTAAACGA   |
| 2  | <i>16sr RNA Rsc</i> TBBS1 (R) | CGAAGGCACCAATCCATC   |
| 3  | <i>Mot A</i> (F)              | GTTTTCCATCATCCAAGC   |
| 4  | <i>Mot A</i> (R)              | GTGCCGAACAGACCCATC   |
| 5  | <i>FliT</i> (F)               | GACCAGCGCCCGGACACG   |
| 6  | <i>FliT</i> (R)               | CGCCGCAAGGCAACGACA   |
| 7  | <i>Chew</i> (F)               | CGGCGACCGTCATTGGCT   |
| 8  | <i>Chew</i> (R)               | GCGCTGCGGATCCTTGGA   |
| 9  | <i>PhcA</i> (F)               | GCAACGTCTGCCTTTTCACT |
| 10 | <i>PhcA</i> (R)               | CGCTGTCATGTGCATCTTCT |
| 11 | <i>HrpB</i> (F)               | AGACCAAGGTGGAAGTCGTG |
| 12 | <i>HrpB</i> (R)               | CGTCTTGCATGTAGCTGGTG |
| 13 | <i>EpsA</i> (F)               | TTCCTCTGACCCAAGGAATG |
| 14 | <i>EpsA</i> (R)               | ATCAAAGGTGTAGCCGTTGG |
| 15 | <i>EpsB</i> (F)               | GGCGTTGTCCTAGGTGTCAT |
| 16 | <i>EpsB</i> (R)               | CGCTTCGATAGATGGGTCAT |
| 17 | <i>EpsC</i> (F)               | ACGGTGACACTTCAACCACA |
| 18 | <i>EpsC</i> (R)               | GCCATGGGCTGTACAAGTTT |

---

|    |                 |                                    |
|----|-----------------|------------------------------------|
| 19 | <i>EpsD</i> (F) | CAGCCGAGATGTGCAAATA                |
| 20 | <i>EpsD</i> (R) | GGGGCAGCATCTACGATAAA               |
| 21 | <i>EpsE</i> (F) | TACCGGCCACACTAGGAAAC               |
| 22 | <i>EpSE</i> (R) | TTTCGCCTGCTAGCAAAAAT               |
| 23 | <i>EpsF</i> (F) | GTTTCTCATCACGGCGTTTT               |
| 24 | <i>EpsF</i> (R) | GGCGAAGGCTATGCTAGATG               |
| 25 | <i>EpsP</i> (F) | CGTGAGATACAGGCGAGACA               |
| 26 | <i>EpsP</i> (R) | GTCTTCGAACGCCATCATT                |
| 27 | <i>Awr1</i> (F) | ACGTTTCCACGCATAACTCC               |
| 28 | <i>Awr1</i> (R) | GTCTGGGTGGCAAAAAGTGT               |
| 29 | <i>Awr3</i> (F) | CTCACGCATTCCTACAAGCA               |
| 30 | <i>Awr3</i> (R) | CCAGTCTGCTCAGGTGACAA               |
| 31 | <i>Awr5</i> (F) | CACATGGCGGAGAGATTTTT               |
| 32 | <i>Awr5</i> (R) | TCGTAGACGTACGCCTGTTG               |
| 33 | <i>PilQ</i> (F) | CAGGGACAAAACCTGGTCGT               |
| 34 | <i>PilQ</i> (R) | CGGAGTCGGTAGCTCTCATC               |
| 35 | <i>RRS1</i> (F) | ATGAGAAAGAGGCTCGTCAA               |
| 36 | <i>RRS1</i> (R) | ACCACAACCCTCAAGCAGTT               |
| 37 | <i>NPRI</i> (F) | CTGGAGCAAGCAGAAAG                  |
| 38 | <i>NPRI</i> (R) | TCATACGCAAATCATCG                  |
| 39 | <i>EDS1</i> (F) | GAG TAT CAG ACC AAG TGT GAT ATC CG |
| 40 | <i>EDS1</i> (R) | GCT GAG GTG GGA GTG TTT TCC ACC    |

---

17 **Table S3: VOC profile of *Bacillus amyloliquefacians* FZB42 and *Bacillus***  
 18 ***artrophaeus* LSSC22**

| <i>Bacillus</i> strain                  | RT (min) | Relative peak area (%) | Compound                                                        | Abbreviation used | Degree of inhibition |
|-----------------------------------------|----------|------------------------|-----------------------------------------------------------------|-------------------|----------------------|
| <i>Bacillus amyloliquefacians</i> FZB42 | 4.567    | 3.829                  | Silanediol, dimethyl                                            | SDD               | –                    |
|                                         | 5.618    | 3.574                  | 1,2-Benz isothiazol-3(2H)-one                                   | 1,2-BIT           | +++                  |
|                                         | 6.963    | 1.865                  | Benzeneacetamide                                                | BAM               | ++                   |
|                                         | 7.631    | 2.573                  | Oxime,methoxy-phenyl                                            | OMP               | NT                   |
|                                         | 7.787    | 3.494                  | (1R)-2,6,6-Trimethylbicyclo[3.1.1]hept-2-ene                    | TMB               | +                    |
|                                         | 8.207    | 1.557                  | Benzoic acid, 2-formyl-4,6-dimethoxy-,8,8-dimethoxyoct-2-yl     | BA                | +                    |
|                                         | 8.949    | 1.695                  | Benzaldehyde                                                    | BDH               | +++                  |
|                                         | 9.543    | 2.277                  | Sulfurous acid, cyclohexylmethyl isobutyl ester                 | SCE               | –                    |
|                                         | 10.148   | 1.406                  | 6-Tridecen, 2,2,4,10,12,12-hexamethyl-7-(3,5,5-trimethylhexyl)- | 6 -THT            | NT                   |
|                                         | 10.304   | 2.116                  | 2-Undecanethiol, 2-methyl                                       | 2-UT,2-M          | –                    |
|                                         | 10.734   | 6.490                  | Dodecane , 1-fluoro                                             | DCF               | ++                   |
|                                         | 12.262   | 1.695                  | Dodecane                                                        | DCN               | ++                   |
|                                         | 14.421   | 2.380                  | Phenol, 2-(1,1-dimethyl)-5-methyl-                              | PH                | –                    |
| <i>Bacillus artrophaeus</i> LSSC22      | 1.301    | 1.073                  | 1,3 –Butadiene                                                  | 1,3-BDN           | ++                   |
|                                         | 5.631    | 5.995                  | 1,2-Benz isothiazol-3(2H)-one                                   | 1,2-BIT           | +++                  |
|                                         | 7.729    | 2.245                  | (1R)-2,6,6-Trimethylbicyclo[3.1.1]hept-2-ene                    | TMB               | +                    |
|                                         | 8.764    | 3.483                  | Benzoic acid                                                    | BA                | +                    |
|                                         | 10.487   | 2.204                  | 1-octyn-3ol, 4- ethyl-                                          | 1,OTN             | ++                   |
|                                         | 10.712   | 8.354                  | Dodecane , 1-fluoro                                             | DCF               | ++                   |
|                                         | 11.575   | 1.491                  | Undecanal, 2-methyl                                             | UDM               | ++                   |
|                                         | 12.264   | 2.768                  | Dodecane                                                        | DCN               | ++                   |
|                                         | 14.413   | 2.694                  | Phenol, 2-(1,1-dimethylethyl)-6-methyl                          | PH                | –                    |
|                                         | 16.669   | 1.213                  | Cyclohexene, 3-(1,5-dimethyl-4-hexenyl)-6-methylene-            | CHN               | NT                   |

19 Minor air-peaks were excluded from the total analysis representing  $\leq 1\%$  of the total

20 area. Similar compounds found in both inoculated and non-inoculated MS medium  
 21 were also not included. **RT**, retention time, - no inhibition, +  $\leq 10\%$  inhibition rate,  
 22 ++ 10-30 % inhibition rate, +++ More than 30 % inhibition, **NT** Not tested

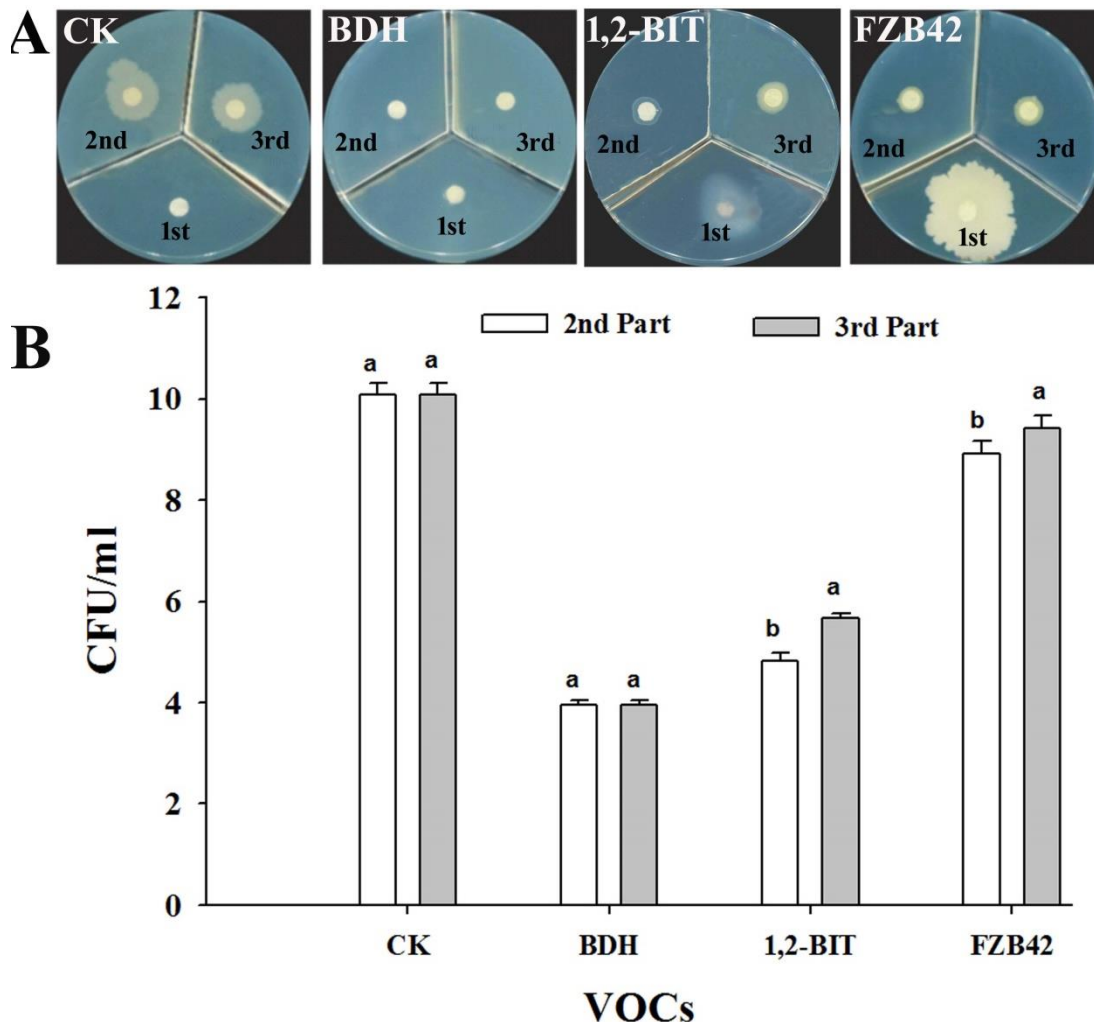

23  
 24 **Fig S1 Effect of the concentration of VOCs** The experiment was conducted in three  
 25 partition plates with completely sealed portions without any air movement except holes  
 26 in two walls of the partitions. An arrangement was made so that VOCs could move  
 27 from the first partition, encompassing *Bacillus* or a synthetic chemical, to the second  
 28 partition and then from the second partition to the third partition. The second and third  
 29 partition both were inoculated with 10  $\mu$ l of *Rsc* (18-24h) culture. The whole  
 30 experiment was repeated three times, including three replicates per experiment. Letters

31 above error bars represent significant differences according to Duncan's multiple-range  
32 test (P=0.05) using SPSS software (SPSS, Chicago, IL).

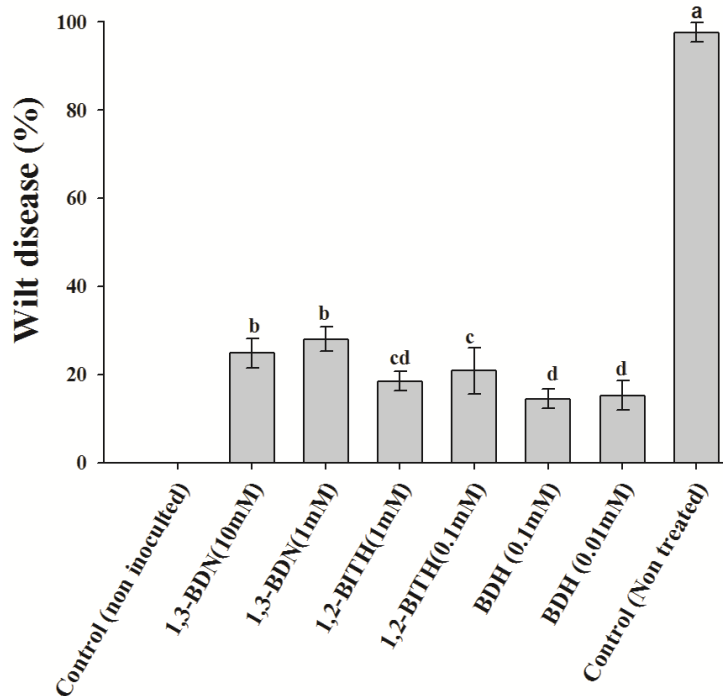

33  
34 **Fig S-2 BDH, 1,2-BITH and 1,3-BDN reduced the virulence of *Ralstonia***  
35 ***solanacearum* and induced systemic resistance** I-plates prepared with  
36 one-half-strength Murashige and Skoog solid medium, and 5-6-day-old emerging  
37 tobacco seedlings (seven seedlings/plate) were dipped in the suspension of *Rsc* ( $10^7$   
38 CFU/mL) cells and transplanted into one compartment. In the non-inoculated control,  
39 the roots were dipped in sterile water. Chemicals (10mM and 1mM 1,3-BDN, 1mM and  
40 0.1mM 1,2-BITH while 0.1mM and 0.01mM BDH) were used in the other  
41 compartment. Wilt symptoms were observed after 7 days of inoculation, and the data  
42 were recorded. Error bars indicate standard deviations of the means. Different letters  
43 above error bars represent significant differences according to Duncan's multiple-range  
44 test (P=0.05) using SPSS software (SPSS, Chicago, IL).
